# Supplementary material for: Comprehensive Analysis of Rice Seedling Transcriptome during Dehydration and Rehydration
Source: MDPI journal article supplement (doi:10.3390/ijms24098439), 2023-05-08
Supplement: s1 [file s1]

Table S1: Summary of RNA-seq libraries.

Table S2: Differentially expressed genes in group 1, 2, 3, 4, 5, and 6.

Table S3: Gene Ontology enrichment analysis of group 1, 2, 3, 4, 5, and 6.

Table S4: Gene Ontology enrichment analysis of cluster 1, 2, 3, 4, and 5.

Table S5: Kyoto Encyclopedia of Genes and Genomes pathway enrichment analysis of cluster 1, 2, 3, 4, and 5.

Table S6: Differentially expressed nitrogen metabolism-related genes in rice.

Table S7: Differentially expressed phytohormone-responsive genes in rice.

Table S8: Differentially expressed phytohormone metabolism-related genes in rice.

Table S9: Differentially expressed transcription factor-encoding genes in rice.

Table S10: Primers used in this study.
